# Supplementary material
Source: publisher figshare collection journal article supplement (https://karger.figshare.com/ndownloader/files/28970589)
Supplement: Supplementary file 1 [file 28970589]

| Supplementary table 1. The mapping of regions of interest (ROIs) to Desikan-Killiany-Tourville (DKT) labels. | | |
| --- | --- | --- |
| No | ROIs | DKT labels |
| 1 | hippocampal gyrus | 17, “left hippocampus” 53, “right hippocampus” |
| 2 | medial orbitofrontal cortex | 1014, “left medial orbitofrontal” 2014, “right medial orbitofrontal” |
| 3 | rostral anterior cingulate cortex | 1026, “left rostral anterior cingulate” 2026, “right rostral anterior cingulate” |
| 4 | caudal anterior cingulate cortex | 1002, “left caudal anterior cingulate” 2002, “right caudal anterior cingulate” |
| 5 | posterior cingulate cortex | 1023, “left posterior cingulate” 2023, “right posterior cingulate” |
| 6 | isthmus | 1010, “left isthmus cingulate” 2010, “right isthmus cingulate” |
| 7 | precuneus | 1025, “left precuneus” 2025, “right precuneus” |
| 8 | supramarginal gyrus | 1031, “left supramarginal” 2031, “right supramarginal” |
|  |  |  |
